# Supplementary material
Source: Elsevier journal article supplement (https://www.sciencedirect.com/science/article/pii/S2530016421001427)
Supplement: mmc2 [file S2530016421001427:mmc2.doc]

Figura B1: Niveles de ARNm en los distintos grupos  de pacientes que recibieron ablación con I131 incluyendo el grupo de respuesta indeterminada o bioquímica incompleta.


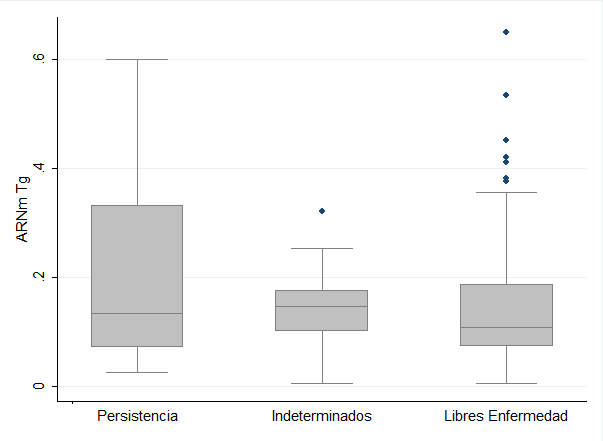


Respuesta indeterminada o bioquímica incompleta

Respuesta excelente

Respuesta estructural incompleta
